# Supplementary material for: Construction of semi-fluorinated amphiphilic graft copolymer bearing a poly(2-methyl-1,4-bistrifluorovinyloxybenzene) backbone and poly(ethylene glycol) side chains via the grafting-onto strategy
Source: Royal Society of Chemistry journal article supplement (doi:10.1039/c5ra02377g), 2015-01-01
Supplement: c5ra02377g1.pdf [file c5ra02377g1.pdf]

Supporting information for

# **Construction of Semi-Fluorinated Amphiphilic Graft Copolymer Bearing Poly(2-methyl-1,4- bistrifluorovinyl)oxybenzene) Backbone and Poly(ethylene glycol) Side Chains via the Grafting-Onto Strategy**

*Guolin Lu,<sup>a,#</sup> Hao Liu,<sup>a,#</sup> Haifeng Gao,<sup>b,\*</sup> Chun Feng,<sup>a,\*</sup> Yongjun Li,<sup>a</sup> Xiaoyu*

*Huang<sup>a,\*</sup>*

<sup>a</sup> Key Laboratory of Synthetic and Self-Assembly Chemistry for Organic Functional Molecules, Shanghai Institute of Organic Chemistry, Chinese Academy of Sciences, 345 Lingling Road, Shanghai 200032, People's Republic of China

<sup>b</sup> Department of Chemistry and Biochemistry, University of Notre Dame, Notre Dame, IN 46556-5670, USA

## **Experimental**

### **Preparation of PMBTFVB Homopolymer**

PMBTFVB **1** homopolymer was prepared via thermal step-growth cycloaddition polymerization of MBTFVB aryl TFVE monomer followed by end-capping with 4-methoxytrifluorovinylbenzene according to previous literatures.<sup>25,26</sup> GPC:  $M_n = 6,100$  g/mol,  $M_w/M_n = 1.23$ . FT-IR:  $\nu$  ( $\text{cm}^{-1}$ ): 3054, 2931, 1598, 1498, 1312, 1269, 1201, 1122, 1009, 963, 926, 812, 742. <sup>1</sup>H NMR:  $\delta$  (ppm): 2.07, 2.27 (3H,  $\text{CH}_3$ ), 3.76 (3H,  $\text{OCH}_3$ ), 6.98, 7.10 (3H, phenyl). <sup>13</sup>C MNR:  $\delta$  (ppm): 16.0 ( $\text{CH}_3$ ), 55.4 ( $\text{OCH}_3$ ), 105.6, 109.3, 112.9 (4C, cyclobutyl), 116.5, 121.4, 131.0, 148.5 (3C, phenyl). <sup>19</sup>F

NMR (CDCl<sub>3</sub>):  $\delta$  (ppm): -127.2 to -132.6 (6F, cyclobutyl-*F*<sub>6</sub>).

### **Mono-Bromination of PMBTFVB**

The pendant methyls of PMBTFVB **1** homopolymer were mono-brominated by NBS and BPO. In a typical procedure, PMBTFVB **1** ( $M_{n, \text{GPC}} = 6,100$  g/mol,  $M_w/M_n = 1.23$ , 2.00 g, 7.04 mmol -CH<sub>3</sub> group), NBS (0.375 g, 2.11 mmol), and BPO (0.341 g, 1.41 mmol) were first added to a 500 mL three-neck flask (flame-dried prior to use) fitted with a reflux condenser followed by deoxygenating under N<sub>2</sub>. Next, CCl<sub>4</sub> (350 mL) was charged via a gastight syringe and the solution was refluxed at 80°C for one day. After filtration, CCl<sub>4</sub> was rotary evaporated from the filtrate. The obtained solid was dissolved in ethyl acetate (400 mL) and the resulting solution was washed with distilled water (200 mL×2) followed by drying over MgSO<sub>4</sub>. The solution was concentrated and precipitated into methanol. After repeated purification by dissolving in THF and precipitating in methanol, 1.301 g of white powder, PMBTFVB-Br **2a** macroinitiator, was obtained after drying *in vacuo* overnight. GPC:  $M_n = 6,900$  g/mol,  $M_w/M_n = 1.26$ . EA: Br%: 6.19%. <sup>1</sup>H NMR:  $\delta$  (ppm): 1.99, 2.18 (3H, CH<sub>3</sub>), 3.68 (3H, OCH<sub>3</sub>), 4.17, 4.34 (2H, CH<sub>2</sub>Br), 6.86, 7.04, 7.16 (3H, phenyl). <sup>13</sup>C MNR:  $\delta$  (ppm): 16.2 (CH<sub>3</sub>), 25.4 (CH<sub>2</sub>Br), 55.4 (ArOCH<sub>3</sub>), 105.8, 109.0, 112.8 (4C, cyclobutyl), 117.5, 119.7, 121.7, 130.0, 149.1 (3C, phenyl). <sup>19</sup>F NMR (CDCl<sub>3</sub>):  $\delta$  (ppm): -127.1 to -132.7 (6F, cyclobutyl-*F*<sub>6</sub>).

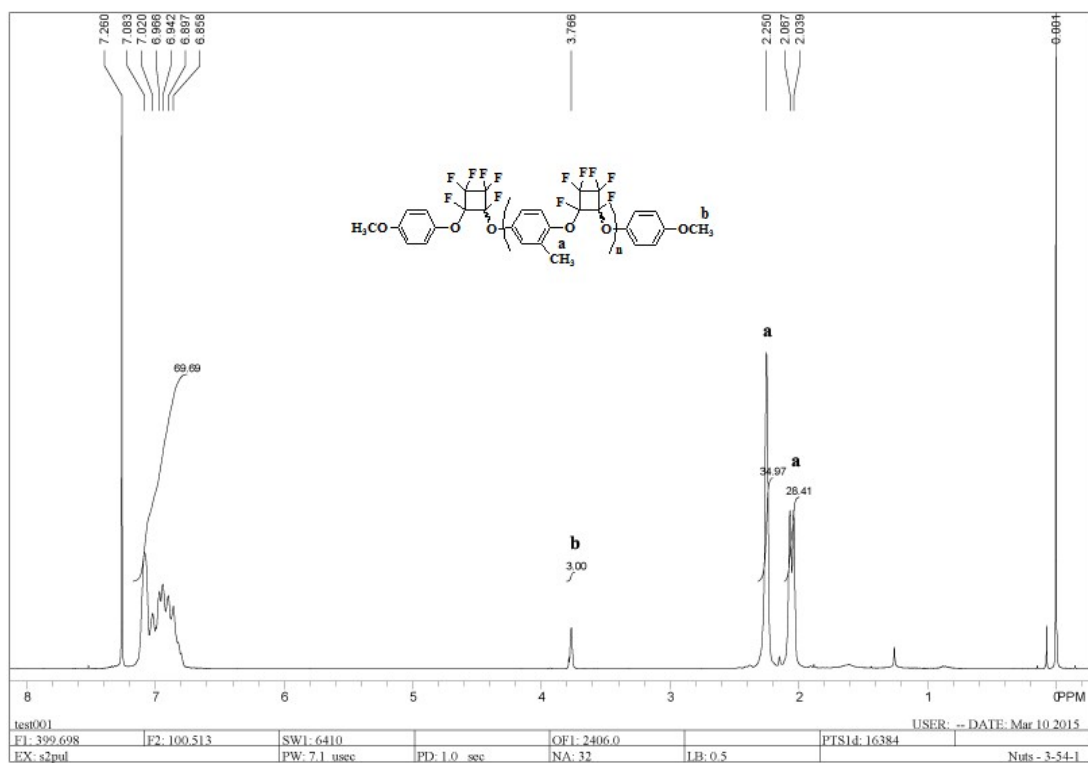

**Figure S1.** <sup>1</sup>H NMR spectrum of PMBTFVB **1** homopolymer in CDCl<sub>3</sub>.

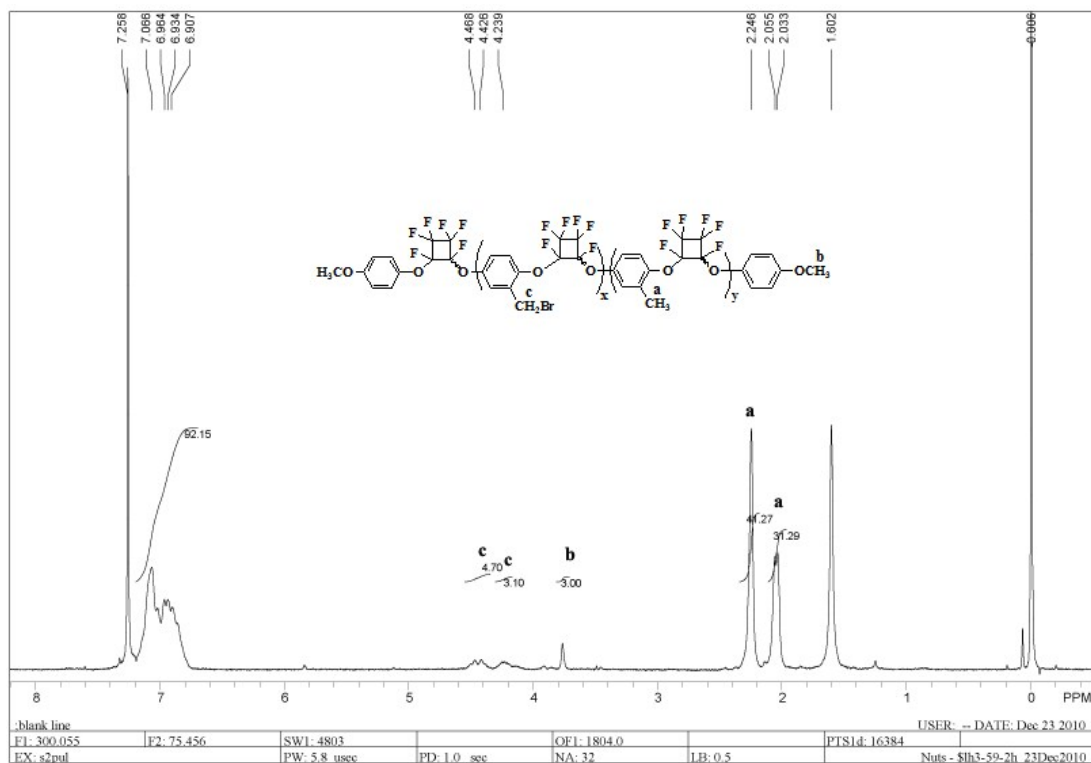

**Figure S2.** <sup>1</sup>H NMR spectrum of PMBTFVB-Br **2a** in CDCl<sub>3</sub>.

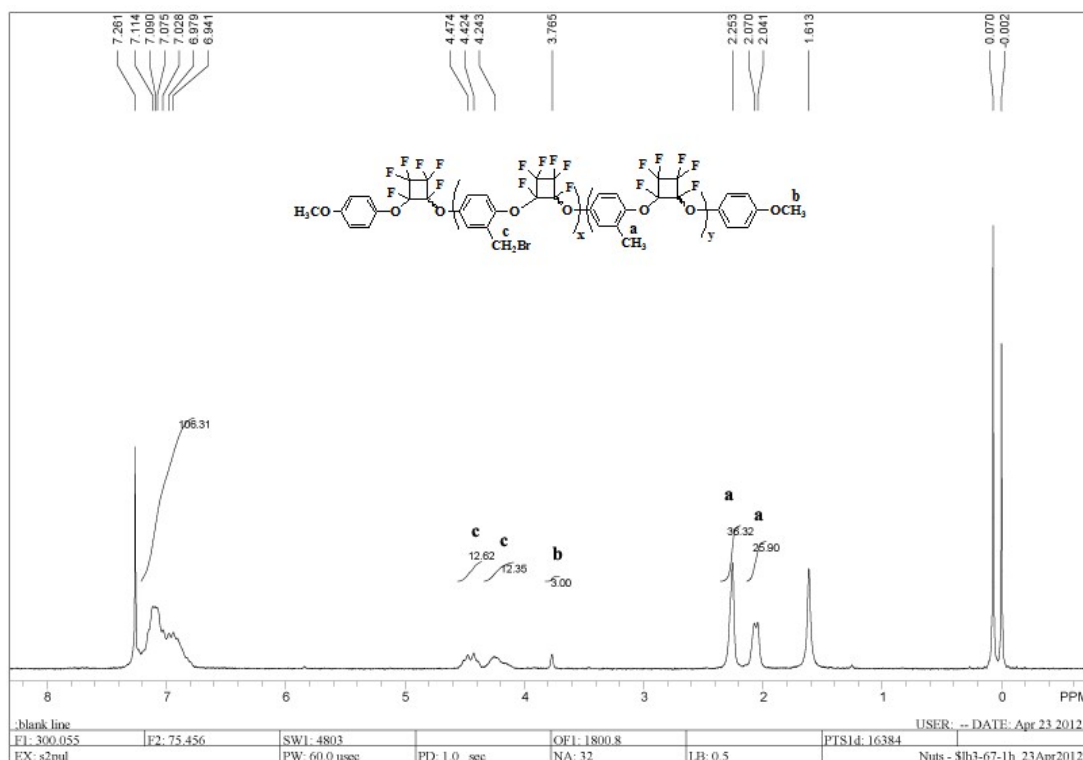

**Figure S3.** <sup>1</sup>H NMR spectrum of PMBTFVB-Br **2b** in CDCl<sub>3</sub>.

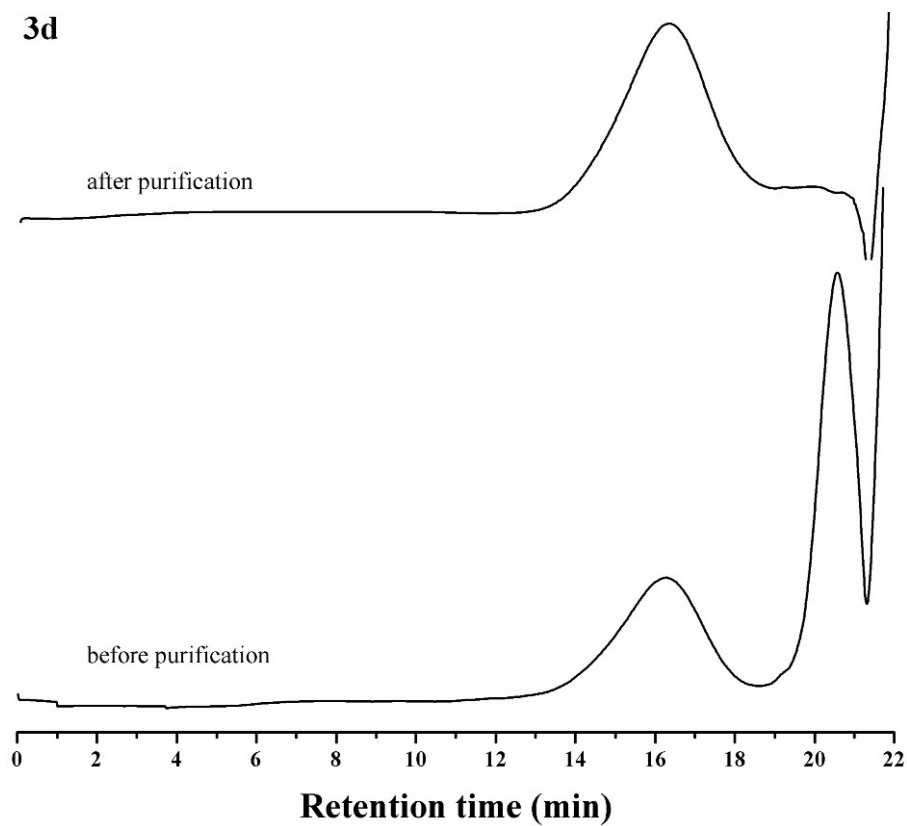

**Figure S4.** GPC curves of copolymer **3d** before and after the purification using preparative gel permeation chromatography.

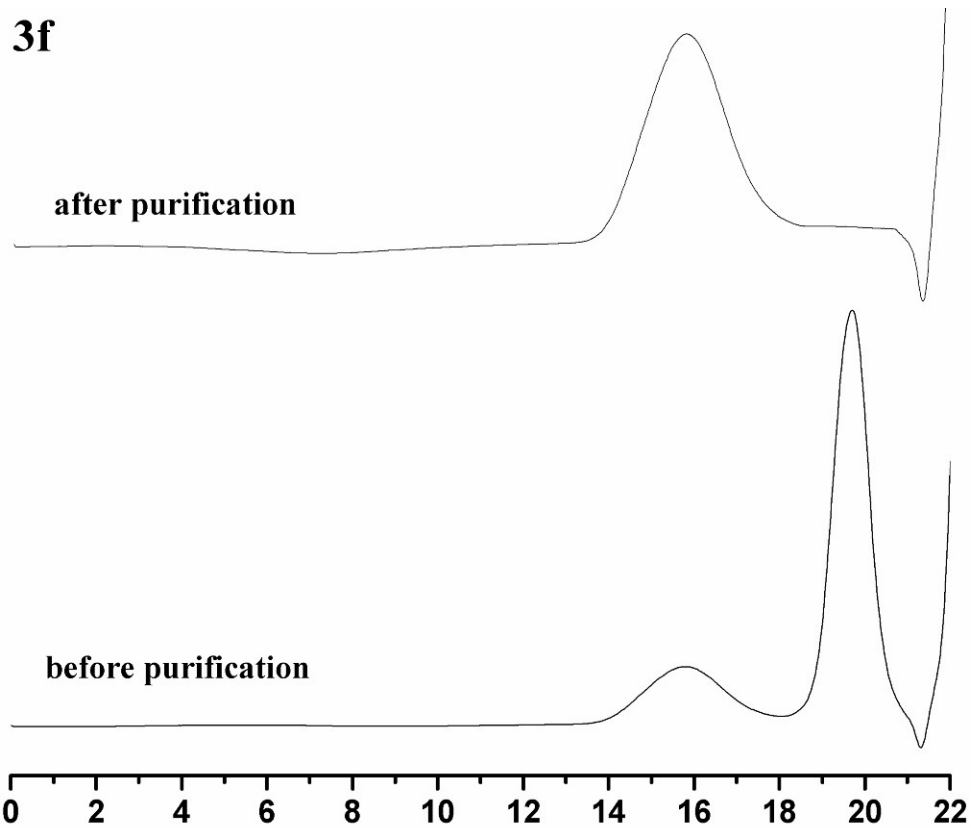

**Figure S5.** GPC curves of copolymer **3f** before and after the purification using preparative gel permeation chromatography.
